# Supplementary material
Source: Research Square preprint supplement (doi:10.21203/rs.3.rs-9463976/v1)
Supplement: Supplementary file 2 [file 82ddcd909e18e723beb76a84.docx]

**SUPPLEMENTARY INFORMATION FOR**

**Distal airway-specific condensation of saliva-free exhaled aerosols enables quantification of pulmonary SARS-CoV-2 RNA load in early COVID-19**

John Henderson1, Theodora Mantso1,2, Saqib Ali1,2, Rüdiger Groß4, Janis A. Müller4,5, Amie Wilkinson3, Louise Usher3, Beth Auld6, Anil Namdeo7, Madeleine Combrinck8, Phil Hackney8, Volkan Turgul9, Edison Jahaj10, Nikolaos Athanasiou10, Taxiarchis Nikolouzakis11, Pedro J. Almeida12, Chrysa Rokka13, Daniel C. Queiroz14, Edward Wright6, Alexandros Zafiropoulos15, Izzet Kale9, Diamantis P. Kofteridis16, Aristides Tsatsakis11, Jan Münch4, Michelle A. Sugimoto2, Paraskevi A. Katsaounou10, Anastasia Kotanidou10, Pagona Lagiou12,17, Gkikas Magiorkinis13, Renato S Aquiar14,18, Mauro M. Teixeira12, and Sterghios A. Moschos1,2,3

**Supplementary Methods**

*EBC Sampling Device and Coolant Chamber Production*

PBM-Hale™ devices were designed in Solidworks v. 2016-2021sp3 (Dassault Systèmes, Corp., Waltham, MA). Prototyping was executed by additive manufacturing using a Stratasys Objet 30 3D printer, Objet 3D Fullcure 705 support resin and Objet VeroWhitePlus FullCure 835 (Tri-tech 3D Ltd., Stoke on Trent, UK). Sterile, RNase/DNAse/pyrogen free, cell culture grade 50mL polypropylene Corning® tubes were used as the EBC specimen collection vessel using CentriStarTM caps or PBM-HaleTM custom-built platform lids for specimen storage. The coolant chamber was manufactured using a Prusa I3 MK3 3D printer and Prusament PLA vanilla white filament (Prusa Research, Prague, Czech Republic) and insulated with 50mm grey Craftfoam (Panel Systems Ltd., Sheffield, UK) used as coolant chamber insulation.

*EBC Sampling Device Decontamination*

Working inside a class II microbial safety cabinet, PBM-Hale™ parts were decontaminated from analytes by 30min immersion in a 0.6% sodium hypochlorite solution (Merck, Manchester, UK), rinsing 3x with copius amounts of RNAse-free water (Thermo Fisher Scientific) and air drying overnight. Parts were then assembled, before packing into sodium hypochlorite-decontaminated zip lock bags, ahead of use. All separator apertures (mouthpiece, platform lid interface, outlet) were sealed by superglueing aluminium foil pre-treated with sodium hypochlorite (10 min) and air-drying.

*Computational Flow Model Parameters*

Exhalation periods of 2min, 5min, and 15min of use were set against ambient conditions of 20oC, 70% ambient relative humidity, 1Atm. Custom solid material models were defined as SYS Vero White (1175kg/m3, isotropic conductivity, absorption coefficient 0L/mm, 1.5 refractive index, 53oC melting temperature in line with the manufacturer product datasheet), and dry ice (1600kg/m3, specific heat of 1188 J/kg*K, isotropic, thermal conductivity in solid form of 0.2W/(m*K) based on previous reports [31, 32]. External walls were set as adiabatic with whitewall default radiative surface and a 0.014mm roughness based on the 0.028 mm layer thickness for the Objet printer assuming uniform layer contours.

*Total Protein Concentration Assay*

Sample volumes of 0.18mL were added to 0.02mL of 10x RIPA buffer (100mM Tris-Cl pH 8.0, 0.5% sodium deoxycholate, 0.5% SDS, 10% Triton X-100, 1.4M NaCl; Thermo Fisher Scientific), chilled on ice for 25min and vortexed at maximum speed intermittently. Lysate volumes of 0.15mL and bovine serum albumin protein standards (2 – 20ng; Thermo Fisher Scientific) were then mixed with 0.15mL of the micro BCA kit working reagent (Thermo Fisher Scientific) and absorbance was measured at 562nm after incubating at 37°C for 4-6 hours using a Spark® Cyto 96 well plate reader (Tecan, Männedorf, Switzerland). Sample protein concentrations were then calculated using the equation of the line of best fit for the standard curve.

*RT-PCR during prototype testing*

For prototype testing, RNA was extracted by adding 0.2mL of each sample to 0.8mL of TRIzol (Thermo Fisher Scientific) and virgorously vortexing for 1min. An 80% v/v fraction of the upper aqueous phase was removed to prevent interphase DNA contamination. After precipitating in 100% isopropanol and washing with 75% ethanol (Thermo Fisher Scientific), RNA was eluted in 0.02mL nuclease-free water. RNA concentrations were then quantified using an ND-1000 Nanodrop spectrophotometer (Thermo Fisher Scientific) at an absorbance of 260nm. RNA samples were converted to cDNA using a maxima first strand cDNA synthesis kit (Thermo Fisher Scientific). qPCR was performed using a PrecisionPLUS qPCR mastermix with SYBR Green (PrimerDesign Ltd., Chandler’s Ford, UK) using either pan-eukaryotic 18S rRNA, human GAPDH, or human β-actin primers (Eurofins Scientific, Luxembourg). Thermal cycling was performed on a BioRad CFX96 (BioRad, Watford, UK) as follows: 2min at 95°C, then 40 cycles of 10sec at 95°C and 60sec at 60°C, with fluorescence measured via the SYBR channel after each cycle. Melt curves were assessed post-PCR to ensure no non-specific amplification occurred.

*Infectious virus concentration determination for recombinant virus production*

HEK293T cells (max passage 20; doubling time of 24hrs) were seeded at a density of 10,000 cells/well in a 96-well plate with culture media consisting of 10% foetal bovine serum (FBS), 1% penicillin/streptomycin Dulbecco’s Modified Eagle Media (Thermo Fisher Scientific) and cultured for 24 hours at 37oC, 5% CO2. Infectious virus concentration was determined by titration culture on HEK-293T cells followed by fluorescent cell sorting (fCM; BD FACSCantoTM II, BD Biosciences, Wokingham, UK) for GFP according to Grigorov *et al* [38].Briefly, 0.05mL volumes of virus were plated onto HEK-293T cultures (20,000 cells) and cells were harvested at 72h post-plating using 0.025% Trypsin/EDTA (Thermo Fisher Scientific) and re-suspended in 0.5% FBS in phosphate buffered saline (PBS) after washing once in PBS. Untransduced cell samples were used to create a gate on a side scatter (SSC-A) *vs* forward scatter (FSC-A) plot selecting for viable HEK293T cells. A second gate was then created on a fluorescin *vs* SSC-A histogram, whereby <0.1% of negative control cells were included and thus denoted as GFP-positive

*Infectious Pseudotyped Virus Nebulisation Assay*

The VSV-GFP stock (8.26 x 105 IFU/mL) was diluted to 5.23 x 103 IFU/mL using reduced serum culture media (2% FBS) whereupon 0.05 mL addition of this 2x working concentration to an equal volume culture 20,000 HEK-293T cells would result in a MOI of 0.0131 and GFP-positive cell counts detectable above background cell autofluorescence with the aforementioned flow cytometry settings. Volumes of 15mL were then nebulized for 15min, by arresting nebulization at 10min to centrifugally (4000xg for 5min at 4oC) eliminate frothing of the VSV-GFP sample in the nebulization chamber. Aerosolized VSV-GFP suspensions collected by PBM-Hale™ were allowed to thaw on ice and centrifuged at 1,000xg for 1min at 4oC to accrue liquid samples. Half the media in 20,000 cell HEK-293T 0.1mL cultures in 96 well plates was then replaced with the aerosol liquid samples to transduce the cells. Supernatants were replaced with fresh culture media at 24h, and GFP positive cells were documented at 72hrs post transduction by fluorescent microscopy (triplicate brightfield and fluorescin channel pictures, BioRad ZOE) at 20x magnification. Nebulised media lacking VSV-GFP were used as a negative control, whereas an aliquot of the non-nebulised 5.22x103 IFU/mL VSV-GFP suspension working dilution was used as the positive control. The fraction of cells positive for GFP expression was then recorded and data was expressed as a % of the mean number of GFP positive cells for the positive control samples, thus providing a value for infectivity relative to the positive control.
